# Supplementary material for: Band gap opening of bilayer graphene by graphene oxide support doping
Source: Royal Society of Chemistry journal article supplement (doi:10.1039/c7ra01134b), 2017-01-01
Supplement: c7ra01134b1.pdf [file c7ra01134b1.pdf]

Electronic Supplementary Information (ESI) for

## **Band Gap Opening of Bilayer Graphene by Graphene oxides**

### **Support Doping**

Shaobin Tang,<sup>\*,†</sup> Weihua Wu,<sup>†</sup> Xiaojun Xie,<sup>‡</sup> Xiaokang Li,<sup>\*,†</sup> and Junjing Gu<sup>‡</sup>

<sup>†</sup>*Key Laboratory of Organo-Pharmaceutical Chemistry of Jiangxi Province, Gannan Normal University, Ganzhou 341000, China*

<sup>‡</sup>*School of physics and electric information, Gannan Normal University, Ganzhou 341000, China*

<sup>‡</sup>*State Key Laboratory of Physical Chemistry of Solid Surfaces and Fujian Provincial Key Laboratory of Theoretical and Computational Chemistry, College of Chemistry and Chemical Engineering, Xiamen University, Xiamen 361005, China*

*\*Correspondence authors e-mail: tsb1980@xmu.edu.cn*

Table S1: The charge transfer  $\Delta q$  ( $e$ ) from GOs to its neighboring graphene layer as a function of the sampling  $k$ -points.

| structure     | $7\times 7$ | $9\times 9$ | $11\times 11$ |
|---------------|-------------|-------------|---------------|
| BG/GO-2OH-2   | -0.03/0.03  | -0.03/0.02  | -0.03/0.02    |
| BG/GO-O-2OH-1 | -0.03/0.0   | -0.03/0.0   | -0.04/0.0     |
| BG/GO-O-2OH-2 | -0.02/0.02  | -0.02/0.01  | -0.02/0.02    |

Table S2: Summary of calculated results for bilayer graphene (BG) supported on other GOs: the adsorption energy per carbon atom of graphene layer  $E_b$  (in meV), the minimum distance  $d_1$  (in Å) between GOs and its neighboring graphene layer, the distance  $d_2$  (in Å) of BG, and the band gap  $E_g$  (in meV) in BG. The corresponding structures are shown in Fig. S1.

| structure       | $E_a$ | $d_1$ | $d_2$ | $E_g$ |
|-----------------|-------|-------|-------|-------|
| BG/GO-2O-a      | -31   | 3.08  | 3.14  | 199   |
| BG/GO-2O-b      | -31   | 3.08  | 3.14  | 199   |
| BG/GO-2OH-2a    | -28   | 2.64  | 3.3   | 94    |
| BG/GO-2OH-2b    | -27   | 2.59  | 3.13  | 40    |
| BG/GO-O-2OH-2a  | -27   | 2.79  | 3.38  | 176   |
| BG/GO-2O-2OH-2b | -37   | 3.05  | 3.33  | 254   |
| BG/GO-2O-4OH-1a | -40   | 2.53  | 3.31  | 49    |
| BG/GO-2O-4OH-2a | -37   | 2.77  | 3.39  | 263   |
| BG/GO-2O-4OH-2b | -38   | 2.75  | 3.38  | 157   |

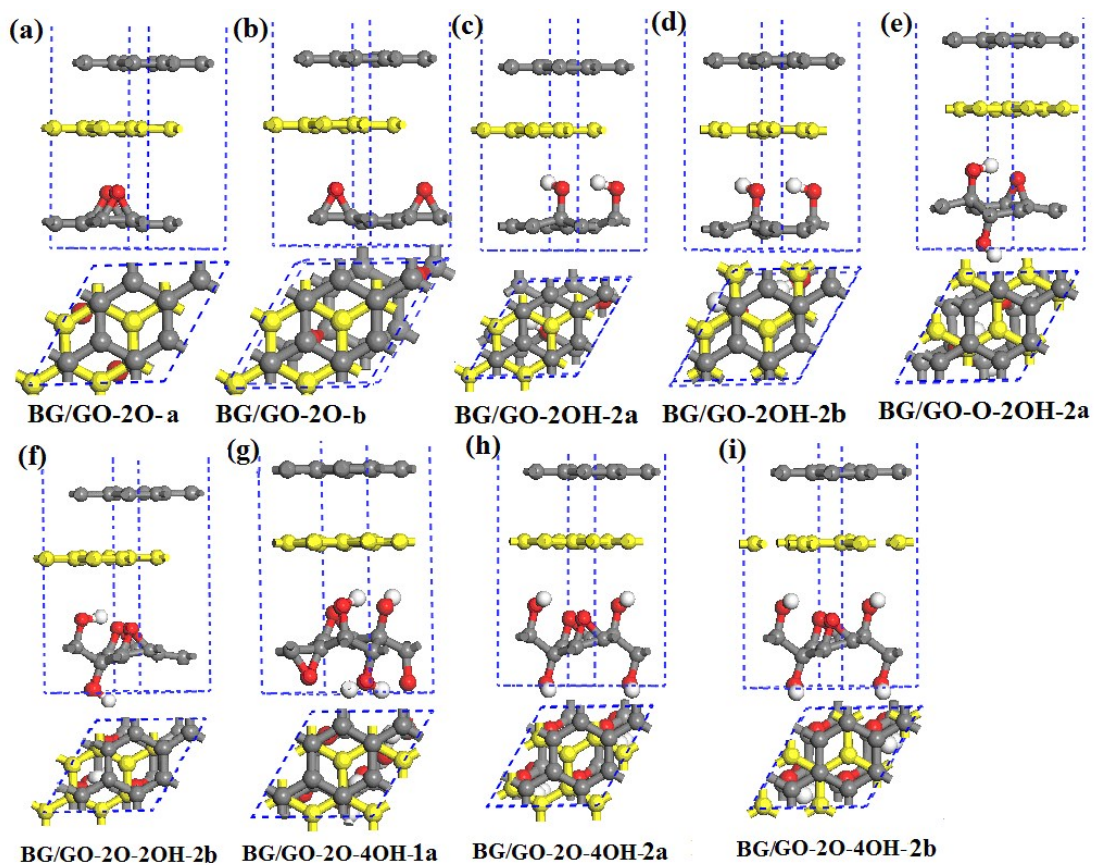

**Fig. S1** Side and top view of optimized structures of BG/GOs for other stacking order. The yellow balls represent the bottom graphene layer.

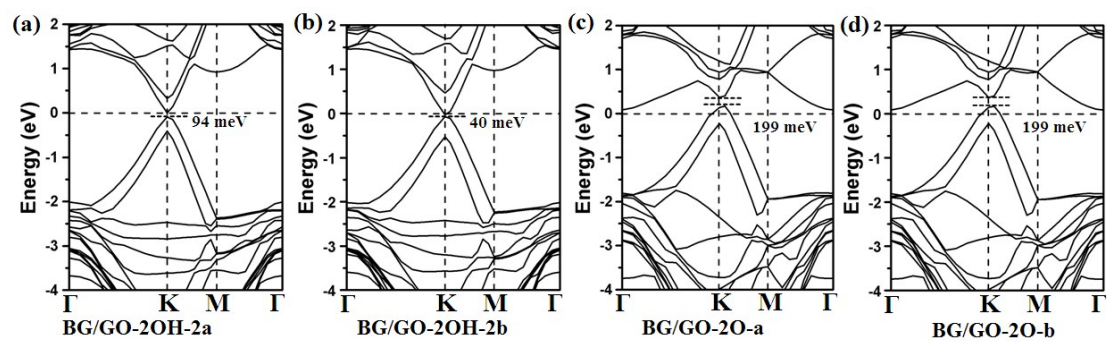

**Fig. S2** Band structures of BG/GOs only containing single the hydroxyl and epoxy groups. The Fermi level is set to 0. The corresponding geometry structures are shown in Figs. S1(a)-(d)

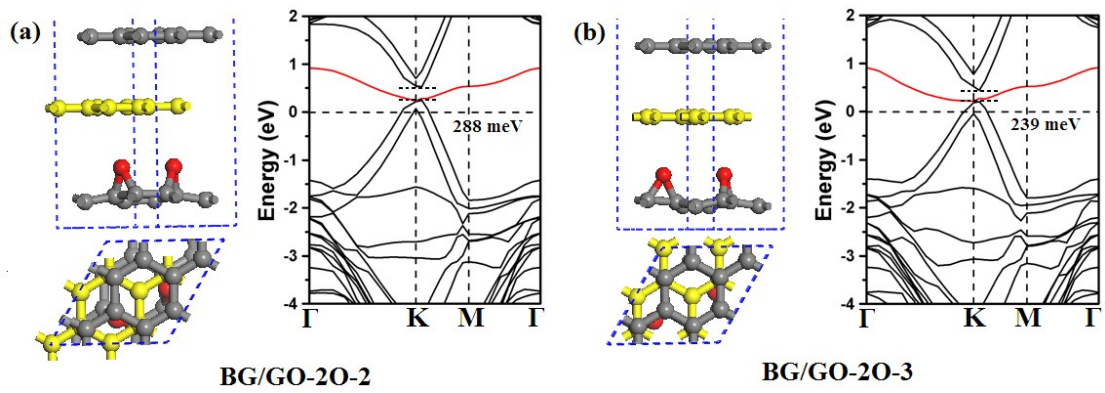

**Fig. S3** Side and top view of optimized structures of BG/GOs for other atomic arrangement of two adsorbed epoxides on substrate (left panel) and the corresponding band structures (right panel). The band marked in red represent the doped state contributed by GOs. The Fermi level is set to 0.

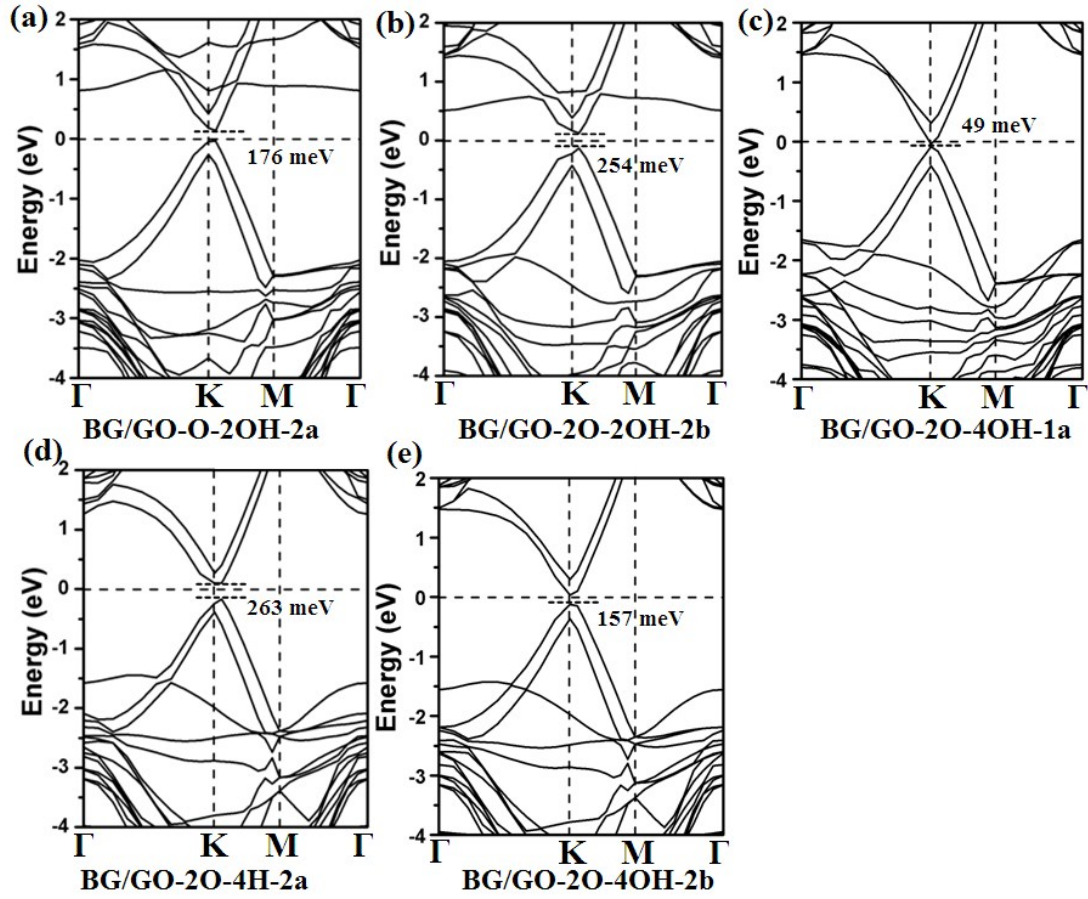

**Fig. S4** Band structures of BG/GOs containing both the hydroxyl and epoxy groups for other stacking pattern. The Fermi level is set to 0. The corresponding geometry structures are shown in Figs. S1(e)-(i).

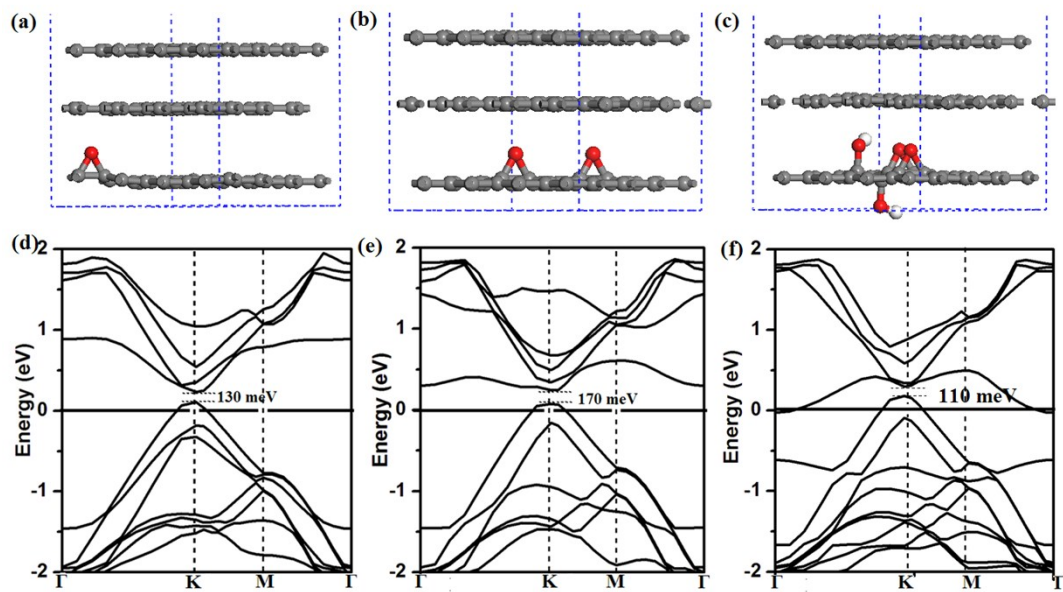

**Fig. S5.** Optimized structures (a-c) and band structures of (d-f) of BG/GOs with low oxidation concentration. (a) and (d) One epoxide, (b) and (e) two epoxides, and (c) and (f) one hydroxyl group and two epoxides. The Fermi level is set to 0.
